# Supplementary material
Source: PubMed Central journal article supplement (PMC4403366)
Supplement: ptc-66-348-OnlineTable.pdf [file ptc-66-348-OnlineTable.pdf]

**Online Table: Keywords Used for Electronic Database Search Under Three Main Concepts**

---

| Muscle | Stability | Characteristics                     |
|--------|-----------|-------------------------------------|
| Muscl* | Stabiliz* | Muscle architecture                 |
|        | Control   | Muscle architectural                |
|        | Stiffness | Muscle fiber type                   |
|        |           | Myosin heavy chain isoforms         |
|        |           | Myofibrillar ATPase                 |
|        |           | Muscle fiber length                 |
|        |           | Titin isoforms                      |
|        |           | Physiological cross-sectional area  |
|        |           | Fiber length to muscle length ratio |
|        |           | Speed of muscle contraction         |
|        |           | Muscle recruitment                  |
|        |           | Muscle onset                        |
|        |           | Feed-forward or feedback            |
|        |           | Muscle mechanics                    |

---
